# Supplementary material
Source: MDPI journal article supplement (https://www.mdpi.com/2076-3417/12/8/3993)
Supplement: s1 [file s1]

Table S1. **(A)** Pearson correlation coefficients between elements measured on the regular grid in the depth 0-10 cm by pXRF (Fe, K, Pb, Ti, Mn, Sr, Sb, Cu, Zn, Zr, Sn, Rb, As, Cd, V, Cr, Ni, Nb, Th),  $\gamma$ -rays DR (dose rate) and cone index data (CI). **(B)** Pearson correlation coefficients between elements measured on the regular grid in the depth 10-45 cm by pXRF (Fe, K, Pb, Ti, Mn, Sr, Sb, Cu, Zn, Zr, Sn, Rb, As, Cd, V, Cr, Ni, Nb, Th),  $\gamma$ -rays DR (dose rate), and cone index data (CI)

| (A)              |          |         |          |          |          |          |          |          |          |          |          |          |          |          |         |          |          |         |         |        |                     |         |          |          |
|------------------|----------|---------|----------|----------|----------|----------|----------|----------|----------|----------|----------|----------|----------|----------|---------|----------|----------|---------|---------|--------|---------------------|---------|----------|----------|
|                  | Ca       | Fe      | K        | Pb       | Ti       | Mn       | Sr       | Sb       | Cu       | Zn       | Zr       | Sn       | Rb       | As       | Cd      | V        | Cr       | Ni      | Nb      | Th     | $\gamma$ -ray<br>DR | CI 0-10 | CI 10-30 | CI 30-45 |
| N. cases         | 79       | 79      | 79       | 79       | 79       | 79       | 79       | 63       | 79       | 79       | 79       | 68       | 79       | 62       | 59      | 79       | 79       | 78      | 79      | 79     | 75                  | 66      | 66       | 66       |
| Fe               | 0.205    |         |          |          |          |          |          |          |          |          |          |          |          |          |         |          |          |         |         |        |                     |         |          |          |
| K                | -0.271*  | -0.097  |          |          |          |          |          |          |          |          |          |          |          |          |         |          |          |         |         |        |                     |         |          |          |
| Pb               | 0.259*   | 0.620** | -0.637** |          |          |          |          |          |          |          |          |          |          |          |         |          |          |         |         |        |                     |         |          |          |
| Ti               | -0.392** | -0.044  | 0.915**  | -0.659** |          |          |          |          |          |          |          |          |          |          |         |          |          |         |         |        |                     |         |          |          |
| Mn               | -0.512** | -0.118  | 0.785**  | -0.709** | 0.919**  |          |          |          |          |          |          |          |          |          |         |          |          |         |         |        |                     |         |          |          |
| Sr               | -0.328** | 0.219   | 0.558**  | -0.370** | 0.652**  | 0.750**  |          |          |          |          |          |          |          |          |         |          |          |         |         |        |                     |         |          |          |
| Sb               | 0.363**  | 0.826** | -0.552** | 0.950**  | -0.595** | -0.643** | -0.142   |          |          |          |          |          |          |          |         |          |          |         |         |        |                     |         |          |          |
| Cu               | 0.325**  | 0.052   | -0.339** | 0.290**  | -0.363** | -0.427** | -0.543** | 0.150    |          |          |          |          |          |          |         |          |          |         |         |        |                     |         |          |          |
| Zn               | 0.317**  | 0.285*  | -0.483** | 0.546**  | -0.464** | -0.516** | -0.437** | 0.445**  | 0.837**  |          |          |          |          |          |         |          |          |         |         |        |                     |         |          |          |
| Zr               | -0.697** | -0.027  | 0.535**  | -0.412** | 0.629**  | 0.696**  | 0.677**  | -0.369** | -0.641** | -0.526** |          |          |          |          |         |          |          |         |         |        |                     |         |          |          |
| Sn               | 0.724**  | 0.757** | -0.534** | 0.715**  | -0.612** | -0.675** | -0.219   | 0.769**  | 0.405**  | 0.521**  | -0.565** |          |          |          |         |          |          |         |         |        |                     |         |          |          |
| Rb               | -0.662** | 0.207   | 0.630**  | -0.324** | 0.675**  | 0.700**  | 0.733**  | -0.297*  | -0.611** | -0.489** | 0.877**  | -0.581** |          |          |         |          |          |         |         |        |                     |         |          |          |
| As               | 0.262*   | 0.632** | -0.432** | 0.750**  | -0.413** | -0.502** | -0.311*  | 0.546**  | 0.369**  | 0.513**  | -0.473** | 0.488**  | -0.224   |          |         |          |          |         |         |        |                     |         |          |          |
| Cd               | -0.051   | 0.676** | -0.379** | 0.840**  | -0.375** | -0.419** | -0.150   | 0.808**  | 0.051    | 0.280*   | -0.198   | 0.342**  | -0.033   | 0.438**  |         |          |          |         |         |        |                     |         |          |          |
| V                | -0.083   | 0.207   | 0.742**  | -0.420** | 0.851**  | 0.773**  | 0.692**  | -0.253*  | -0.271*  | -0.303** | 0.467**  | -0.109   | 0.487**  | -0.220   | -0.307* |          |          |         |         |        |                     |         |          |          |
| Cr               | 0.243*   | 0.403** | -0.405** | 0.472**  | -0.393** | -0.422** | -0.227*  | 0.391**  | 0.246*   | 0.354**  | -0.349** | 0.410**  | -0.256*  | 0.433**  | 0.322*  | -0.290** |          |         |         |        |                     |         |          |          |
| Ni               | 0.610**  | 0.656** | -0.487** | 0.742**  | -0.528** | -0.563** | -0.187   | 0.788**  | 0.349**  | 0.495**  | -0.513** | 0.895**  | -0.408** | 0.570**  | 0.457** | -0.173   | 0.388**  |         |         |        |                     |         |          |          |
| Nb               | -0.585** | 0.293** | 0.441**  | -0.085   | 0.522**  | 0.569**  | 0.689**  | -0.052   | -0.569** | -0.351** | 0.869**  | -0.300*  | 0.838**  | -0.135   | 0.134   | 0.485**  | -0.136   | -0.201  |         |        |                     |         |          |          |
| Th               | -0.226*  | -0.045  | 0.346**  | -0.301** | 0.381**  | 0.406**  | 0.532**  | -0.224   | -0.497** | -0.469** | 0.585**  | -0.200   | 0.462**  | -0.410** | -0.238  | 0.425**  | -0.327** | -0.234* | 0.500** |        |                     |         |          |          |
| $\gamma$ -ray DR | -0.010   | -0.066  | 0.195    | -0.372** | 0.324**  | 0.417**  | 0.306**  | -0.066   | -0.228*  | -0.265*  | 0.228*   | -0.059   | 0.180    | -0.308*  | -0.118  | 0.390**  | -0.247*  | -0.179  | 0.163   | 0.261* |                     |         |          |          |
| CI 0-10          | 0.112    | 0.230   | -0.094   | 0.293*   | -0.138   | -0.219   | -0.124   | 0.209    | 0.221    | 0.293*   | -0.130   | 0.292*   | -0.099   | 0.235    | 0.171   | -0.023   | 0.231    | 0.176   | -0.054  | -0.098 | -0.155              |         |          |          |
| CI 10-30         | 0.048    | 0.182   | 0.075    | 0.244*   | -0.057   | -0.207   | -0.189   | 0.204    | 0.109    | 0.196    | 0.004    | 0.190    | 0.014    | 0.120    | 0.201   | -0.080   | 0.082    | 0.141   | 0.051   | 0.003  | -0.106              | 0.504** |          |          |
| CI 30-45         | -0.073   | 0.126   | 0.114    | -0.009   | 0.115    | 0.055    | -0.016   | -0.050   | 0.070    | -0.049   | 0.091    | -0.032   | 0.092    | 0.072    | 0.050   | 0.020    | 0.118    | -0.021  | 0.083   | -0.006 | 0.066               | -0.059  | 0.445**  |          |
| CI 45-60         | -0.091   | 0.146   | 0.015    | 0.142    | -0.024   | -0.093   | -0.117   | 0.070    | 0.031    | -0.017   | 0.071    | -0.010   | 0.094    | 0.155    | 0.131   | -0.127   | 0.064    | 0.004   | 0.057   | -0.072 | -0.170              | 0.069   | 0.469**  | 0.600**  |

| (B)       |          |          |          |          |          |          |          |          |          |          |          |          |          |         |         |          |          |          |         |        |              |         |          |          |
|-----------|----------|----------|----------|----------|----------|----------|----------|----------|----------|----------|----------|----------|----------|---------|---------|----------|----------|----------|---------|--------|--------------|---------|----------|----------|
|           | Ca       | Fe       | K        | Pb       | Ti       | Mn       | Sr       | Sb       | Cu       | Zn       | Zr       | Sn       | Rb       | As      | Cd      | V        | Cr       | Ni       | Nb      | Th     | γ-rays<br>DR | CI 0-10 | CI 10-30 | CI 30-45 |
| N. cases  | 74       | 74       | 74       | 74       | 74       | 74       | 74       | 56       | 74       | 74       | 74       | 58       | 74       | 70      | 45      | 74       | 74       | 71       | 74      | 74     | 74           | 65      | 65       | 65       |
| Fe        | 0.376**  |          |          |          |          |          |          |          |          |          |          |          |          |         |         |          |          |          |         |        |              |         |          |          |
| K         | -0.415** | -0.271*  |          |          |          |          |          |          |          |          |          |          |          |         |         |          |          |          |         |        |              |         |          |          |
| Pb        | 0.460**  | 0.753**  | -0.675** |          |          |          |          |          |          |          |          |          |          |         |         |          |          |          |         |        |              |         |          |          |
| Ti        | -0.504** | -0.184   | 0.904**  | -0.698** |          |          |          |          |          |          |          |          |          |         |         |          |          |          |         |        |              |         |          |          |
| Mn        | -0.582** | -0.319** | 0.816**  | -0.778** | 0.899**  |          |          |          |          |          |          |          |          |         |         |          |          |          |         |        |              |         |          |          |
| Sr        | -0.221   | -0.060   | 0.625**  | -0.521** | 0.654**  | 0.697**  |          |          |          |          |          |          |          |         |         |          |          |          |         |        |              |         |          |          |
| Sb        | 0.509**  | 0.746**  | -0.610** | 0.967**  | -0.637** | -0.750** | -0.347** |          |          |          |          |          |          |         |         |          |          |          |         |        |              |         |          |          |
| Cu        | 0.514**  | 0.369**  | -0.572** | 0.533**  | -0.568** | -0.592** | -0.432** | 0.583**  |          |          |          |          |          |         |         |          |          |          |         |        |              |         |          |          |
| Zn        | 0.553**  | 0.488**  | -0.688** | 0.671**  | -0.677** | -0.694** | -0.522** | 0.642**  | 0.836**  |          |          |          |          |         |         |          |          |          |         |        |              |         |          |          |
| Zr        | -0.580** | -0.179   | 0.757**  | -0.542** | 0.748**  | 0.724**  | 0.582**  | -0.510** | -0.636** | -0.662** |          |          |          |         |         |          |          |          |         |        |              |         |          |          |
| Sn        | 0.776**  | 0.619**  | -0.609** | 0.772**  | -0.647** | -0.730** | -0.251   | 0.855**  | 0.627**  | 0.651**  | -0.596** |          |          |         |         |          |          |          |         |        |              |         |          |          |
| Rb        | -0.642** | -0.196   | 0.800**  | -0.514** | 0.714**  | 0.726**  | 0.609**  | -0.452** | -0.633** | -0.654** | 0.870**  | -0.614** |          |         |         |          |          |          |         |        |              |         |          |          |
| As        | 0.405**  | 0.649**  | -0.310** | 0.628**  | -0.278*  | -0.430** | -0.270*  | 0.519**  | 0.305*   | 0.488**  | -0.346** | 0.381**  | -0.397** |         |         |          |          |          |         |        |              |         |          |          |
| Cd        | 0.076    | 0.613**  | -0.356*  | 0.796**  | -0.347*  | -0.466** | -0.323*  | 0.732**  | 0.319*   | 0.405**  | -0.195   | 0.354*   | -0.133   | 0.481** |         |          |          |          |         |        |              |         |          |          |
| V         | -0.276*  | 0.010    | 0.766**  | -0.548** | 0.878**  | 0.773**  | 0.668**  | -0.494** | -0.427** | -0.517** | 0.621**  | -0.367** | 0.551**  | -0.199  | -0.343* |          |          |          |         |        |              |         |          |          |
| Cr        | 0.441**  | 0.494**  | -0.501** | 0.701**  | -0.557** | -0.558** | -0.341** | 0.714**  | 0.521**  | 0.571**  | -0.456** | 0.670**  | -0.416** | 0.401** | 0.386** | -0.427** |          |          |         |        |              |         |          |          |
| Ni        | 0.530**  | 0.663**  | -0.579** | 0.753**  | -0.592** | -0.669** | -0.307** | 0.801**  | 0.599**  | 0.670**  | -0.542** | 0.743**  | -0.501** | 0.519** | 0.547** | -0.469** | 0.546**  |          |         |        |              |         |          |          |
| Nb        | -0.612** | -0.029   | 0.715**  | -0.404** | 0.735**  | 0.689**  | 0.565**  | -0.399** | -0.640** | -0.611** | 0.906**  | -0.555** | 0.840**  | -0.172  | -0.057  | 0.612**  | -0.376** | -0.429** |         |        |              |         |          |          |
| Th        | -0.444** | 0.011    | 0.469**  | -0.286*  | 0.535**  | 0.396**  | 0.364**  | -0.212   | -0.296*  | -0.280*  | 0.537**  | -0.355** | 0.498**  | -0.126  | 0.063   | 0.532**  | -0.298** | -0.258*  | 0.566** |        |              |         |          |          |
| γ-rays DR | -0.134   | -0.080   | 0.390**  | -0.349** | 0.451**  | 0.436**  | 0.491**  | -0.204   | -0.315** | -0.374** | 0.317**  | -0.099   | 0.283*   | -0.188  | -0.200  | 0.511**  | -0.191   | -0.242*  | 0.319** | 0.197  |              |         |          |          |
| CI 0-10   | 0.101    | 0.186    | -0.190   | 0.238    | -0.188   | -0.238   | -0.167   | 0.163    | 0.110    | 0.203    | -0.196   | 0.167    | -0.160   | 0.002   | 0.250   | -0.044   | -0.002   | 0.206    | -0.160  | 0.051  | -0.155       |         |          |          |
| CI 10-30  | 0.117    | 0.139    | -0.166   | 0.230    | -0.184   | -0.241   | -0.217   | 0.221    | 0.173    | 0.263*   | -0.185   | 0.230    | -0.109   | -0.076  | 0.061   | -0.136   | 0.203    | 0.272*   | -0.175  | -0.069 | -0.106       | 0.505** |          |          |
| CI 30-45  | -0.065   | -0.037   | 0.112    | -0.122   | 0.115    | 0.107    | 0.055    | -0.179   | -0.051   | -0.103   | 0.118    | -0.109   | 0.116    | -0.145  | -0.231  | 0.057    | -0.038   | -0.082   | 0.021   | -0.073 | 0.066        | -0.067  | 0.433**  |          |
| CI 45-60  | -0.034   | 0.146    | 0.011    | 0.191    | -0.075   | -0.151   | -0.179   | 0.120    | 0.056    | 0.053    | 0.076    | -0.020   | 0.113    | 0.059   | 0.318*  | -0.150   | 0.068    | 0.155    | 0.032   | -0.135 | -0.170       | 0.065   | 0.465**  | 0.604**  |

\*\* Correlation is significant at level 0.01 (two tails).

\* Correlation is significant at level 0.05 (two tails).
